# Supplementary material for: Cell Membrane Adaptations Mediate β-Lactam-Induced Resensitization of Daptomycin-Resistant (DAP-R) Staphylococcus aureus In Vitro
Source: MDPI journal article supplement (doi:10.3390/microorganisms9051028), 2021-05-11
Supplement: s1 [file s1]

## Supplemental Methods

### *Construction of mprF-mutants by allelic exchange*

The introduction of a secondary *mprF* mutation into the three DAP-R backgrounds (which contain a single *mprF* mutation) was conducted using the allelic exchange protocol developed by Monk and Stinear [44] with modification (outlined below).

Oligonucleotides tailed with sequence complementary to pIMAY-Z were designed to amplify a  $\approx 1.2$  kb region surrounding the secondary *mprF* mutation (table S2), the LOX passaged DAP-resensitized strains serving as a donor for the sequence. Amplicons were gel extracted and three separate Seamless Ligation Cloning Extracts (SLiCE) were performed into the linearized pIMAY-Z backbone [45]. Each 10  $\mu$ L SLiCE reaction contained 1  $\mu$ L of 10  $\times$  ligation buffer (NEB), 1  $\mu$ L pIMAY-Z (50–100 ng/ $\mu$ L), 3  $\mu$ L of gel extracted insert (20–30 ng/ $\mu$ L), 4  $\mu$ L of dH<sub>2</sub>O, and 1  $\mu$ L of SLiCE, incubated at 37 °C for 30 min.

The generation of competent cells (for *E. coli*): an overnight culture of *E. coli* strain IM08B [46] grown in Luria–Bertani broth (LB) was diluted 1:200 and incubated at 37 °C with agitation (200 rpm) to an optical density at 600 nm (OD<sub>600</sub>) of 0.5–0.7. Culture were moved to ice (minimum 15 min) to arrest growth, with all subsequent steps performed at 4 °C. Cells were collected by centrifugation (5,000  $\times$  g, 20 min), washed twice with an equal volume of autoclaved ice-cold dH<sub>2</sub>O, then washed twice with an equal volume of ice-cold 10 % (v/v) glycerol in dH<sub>2</sub>O, and lastly resuspended 1:1000 in the original culture volume of ice-cold 10 % (v/v) glycerol in dH<sub>2</sub>O. Aliquots of 40  $\mu$ L were frozen at –80 °C.

Before the transformation of IM08B, the SLiCE reaction was dialyzed for 10 min on a mixed cellulose ester membrane filter (0.025  $\mu$ M, MF-Millipore). Electrocompetent IM08B cells were thawed on ice and 5  $\mu$ L of SLiCE reaction was added to the cells; then, they were gently flicked to mix. Cells were transferred to a 1 mm electroporation cuvette (Bio-Rad) and electroporated at 1800 V, 200  $\Omega$  and 25  $\mu$ F. Cells were immediately resuspended in 1 mL of LB broth and incubated at 37 °C for 1 hour. IM08B transformants were selected in LB supplemented with 10  $\mu$ g/mL chloramphenicol, incubated overnight at 37 °C with agitation (200 rpm).

The FavorPrep Plasmid Extraction Mini Kit (Favorgen) was used to isolate pIMAY-Z, following the manufacturer's guidelines with the following exceptions: 25 mL of culture was run through each column, and 2.5  $\times$  volume of buffers FAPD1, FAPD2 and FAPD3 were used. Plasmids were concentrated using the Novagen Pellet Paint Co-Precipitant precipitation protocol.

To create the electrocompetent *S. aureus* cells, once the cells were diluted to an OD<sub>600</sub> of 0.5 (Cell Density Meter, Biowave), they were incubated for  $\approx 1.5$  hours to an OD<sub>600</sub> of  $\approx 1.0$ . Concentrated pIMAY-Z was electroporated into the respective DAP-R strains (J03, D712 and C25) according to the published protocol [44].

Allelic exchange was performed following the “Slow (2015) Integration” approach [44]. At the final stage, white colonies (potential *mprF*-double mutants (DM)) were screened on MH agar supplemented with 4  $\mu$ g/mL daptomycin in parallel grown on BHI agar.

Suspected *mprF* DM colonies and cultures of the parent DAP-R strains used for allelic exchange underwent whole-genome sequencing

(WGS) to confirm their genotype, performed as previously described [41]. Briefly, gDNA was extracted from a single colony (Chemagic DNA/RNA kit, Perkin Elmer), WGS libraries prepared (Nextera XT DNA preparation kit, Illumina), and sequencing conducted on a NextSeq (Illumina) with 2 × 150 bp chemistry. The short-read sequence data were mapped to complete reference genomes J01 (CC8, RefSeq accession NZ\_CP040619.1) or D592 (CC5, NZ\_CP040665.1), and mutations were identified using Snippy v4.6.0 (<https://github.com/tseemann/snippy>). Both the primary (from the DAP-R parent) and secondary (introduced) *mprF* mutations were confirmed in all three backgrounds. Only one off-target missense mutations was identified: a A308V amino acid change in predicted gene FFX42\_RS09315 in the D712 *mprF* DM (reference D592, CC5 background).

**Table S1.** Oligonucleotides used in allelic exchange protocol.

| Oligonucleotide name | 5' to 3' sequence                                  |
|----------------------|----------------------------------------------------|
| pIMAY-Z_C25_F        | CCTCACTAAAGGGAACAAAAGCTGGGTACCTGGTGCTTATAATGTTGGGC |
| pIMAY-Z_C25_R        | CGACTCACTATAGGGCGAATTGGAGCTCGACGTAACATCTTTAGCAGG   |
| pIMAY-Z-J03_F        | CCTCACTAAAGGGAACAAAAGCTGGGTACCCGTTAGGTGATGAAAATGCC |
| pIMAY-Z-J03_R        | CGACTCACTATAGGGCGAATTGGAGCTCGACCCATTAGATACAGGTGG   |
| PIMAY-Z-D712_F       | CCTCACTAAAGGGAACAAAAGCTGGGTACCAAGAAGCACTCATAATCGGC |
| PIMAY-Z-D712_R       | CGACTCACTATAGGGCGAATTGGAGCTCCGTAAGTGAAGAATGTGCC    |

**Table S2.** Fatty acid (FA) composition (%) of LOX-passaged strain.

| FAs                     | C24       | C25                    | C25-LOX                  | D592      | D712                   | D712-LOX                 | J01       | J03                    | J03-LOX                  |
|-------------------------|-----------|------------------------|--------------------------|-----------|------------------------|--------------------------|-----------|------------------------|--------------------------|
| <b>% of Iso FAs</b>     |           |                        |                          |           |                        |                          |           |                        |                          |
| <b>14:0</b>             | 9 ± 0.0   | 7 ± 0.01 <sup>a</sup>  | 7 ± 0.04 <sup>b,c</sup>  | 5 ± 0.2   | 5 ± 0.0 <sup>a</sup>   | 7 ± 0.03 <sup>b,c</sup>  | 11 ± 0.03 | 8 ± 0.1 <sup>b</sup>   | 8 ± 0.04 <sup>b,c</sup>  |
| <b>15:0</b>             | 15 ± 0.02 | 14 ± 0.01 <sup>a</sup> | 12 ± 0.01 <sup>b,c</sup> | 14 ± 0.02 | 15 ± 0.02 <sup>a</sup> | 14 ± 0.01 <sup>c</sup>   | 13 ± 0.02 | 13 ± 0.1 <sup>b</sup>  | 13 ± 0.1 <sup>c</sup>    |
| <b>16:0</b>             | 3 ± 0.01  | 3 ± 0.0 <sup>a</sup>   | 2 ± 0.01 <sup>b,c</sup>  | 2 ± 0.02  | 2 ± 0.0                | 1 ± 0.01 <sup>b,c</sup>  | 4 ± 0.0   | 4 ± 0.0 <sup>b</sup>   | 3 ± 0.0 <sup>b,c</sup>   |
| <b>17:0</b>             | 3 ± 0.01  | 4 ± 0.0 <sup>a</sup>   | 3 ± 0.01 <sup>c</sup>    | 2 ± 0.01  | 4 ± 0.01 <sup>a</sup>  | 2 ± 0.0 <sup>b,c</sup>   | 3 ± 0.01  | 4 ± 0.0 <sup>b</sup>   | 4 ± 0.0 <sup>b,c</sup>   |
| <b>Total iso FA</b>     | 30 ± 0.1  | 27 ± 0.01 <sup>a</sup> | 25 ± 0.07 <sup>b,c</sup> | 24 ± 0.6  | 25 ± 0.01 <sup>a</sup> | 25 ± 0.04 <sup>b</sup>   | 31 ± 0.03 | 29 ± 0.1 <sup>b</sup>  | 27 ± 0.1 <sup>b,c</sup>  |
| <b>% of Anteiso FAs</b> |           |                        |                          |           |                        |                          |           |                        |                          |
| <b>15:0</b>             | 4 ± 0.0   | 5 ± 0.01 <sup>a</sup>  | 5 ± 0.01 <sup>c</sup>    | 38 ± 0.1  | 40 ± 0.1 <sup>a</sup>  | 37 ± 0.03 <sup>b,c</sup> | 36 ± 0.0  | 39 ± 0.2 <sup>a</sup>  | 37 ± 0.11 <sup>b,c</sup> |
| <b>17:0</b>             | 37 ± 0.08 | 39 ± 0.03 <sup>a</sup> | 37 ± 0.2 <sup>b,c</sup>  | 4 ± 0.0   | 5 ± 0.01 <sup>a</sup>  | 3 ± 0.0 <sup>b,c</sup>   | 4 ± 0.0   | 5 ± 0.01 <sup>a</sup>  | 5 ± 0.0 <sup>b</sup>     |
| <b>Total Anteiso FA</b> | 41 ± 0.12 | 44 ± 0.02 <sup>a</sup> | 42 ± 0.2 <sup>b,c</sup>  | 41 ± 0.1  | 45 ± 0.1 <sup>a</sup>  | 40 ± 0.03 <sup>b,c</sup> | 40 ± 0.03 | 45 ± 0.2 <sup>a</sup>  | 43 ± 0.11 <sup>b,c</sup> |
| <b>% of SFAs</b>        |           |                        |                          |           |                        |                          |           |                        |                          |
| <b>14:0</b>             | 1 ± 0.01  | 1 ± 0.0 <sup>a</sup>   | 1 ± 0.0 <sup>b,c</sup>   | 1 ± 0.1   | 1 ± 0.01 <sup>a</sup>  | 2 ± 0.0 <sup>b,c</sup>   | 1 ± 0.01  | 1 ± 0.01               | 1 ± 0.01                 |
| <b>16:0</b>             | 4 ± 0.0   | 3 ± 0.0 <sup>a</sup>   | 4 ± 0.01 <sup>b,c</sup>  | 4 ± 0.0   | 4 ± 0.0 <sup>a</sup>   | 7 ± 0.01 <sup>b,c</sup>  | 5 ± 0.01  | 4 ± 0.02 <sup>a</sup>  | 4 ± 0.02 <sup>b</sup>    |
| <b>17:0</b>             | 1 ± 0.0   | 1 ± 0.01 <sup>a</sup>  | 1 ± 0.01 <sup>b,c</sup>  | 1 ± 0.0   | 1 ± 0.1 <sup>a</sup>   | 2 ± 0.0 <sup>b,c</sup>   | 1 ± 0.01  | 1 ± 0.0                | 2 ± 0.0 <sup>b,c</sup>   |
| <b>18:0</b>             | 11 ± 0.02 | 10 ± 0.01 <sup>a</sup> | 13 ± 0.09 <sup>b,c</sup> | 12 ± 0.0  | 12 ± 0.0 <sup>a</sup>  | 13 ± 0.02 <sup>b,c</sup> | 12 ± 0.02 | 12 ± 0.1 <sup>a</sup>  | 12 ± 0.1 <sup>b</sup>    |
| <b>19:0</b>             | 2 ± 0.01  | 2 ± 0.01               | 3 ± 0.05 <sup>b,c</sup>  | 2 ± 0.02  | 2 ± 0.02 <sup>a</sup>  | 3 ± 0.01 <sup>b,c</sup>  | 2 ± 0.0   | 1 ± 0.02 <sup>a</sup>  | 3 ± 0.02 <sup>b,c</sup>  |
| <b>20:0</b>             | 6 ± 0.02  | 6 ± 0.03               | 7 ± 0.2 <sup>b</sup>     | 5 ± 0.04  | 5 ± 0.04 <sup>a</sup>  | 5 ± 0.02 <sup>b,c</sup>  | 4 ± 0.01  | 4 ± 0.04 <sup>a</sup>  | 4 ± 0.04 <sup>*</sup>    |
| <b>Total SFA</b>        | 25 ± 0.03 | 22 ± 0.03 <sup>a</sup> | 29 ± 0.3 <sup>b,c</sup>  | 31 ± 0.4  | 26 ± 0.2 <sup>a</sup>  | 31 ± 0.2 <sup>c</sup>    | 25 ± 0.02 | 22 ± 0.11 <sup>a</sup> | 26 ± 0.04 <sup>b,c</sup> |

<sup>a</sup> P-value < 0.05; DAP-R vs. DAP=S; <sup>b</sup> P-value < 0.05; LOX passaged strains vs. DAP-S. <sup>c</sup> P-value < 0.05; LOX passaged strains vs. DAP-R.  
SFA=Saturated/Straight Cha
